# Supplementary material for: Bovine Parainfluenza Virus Type 3 (BPIV3) Enters HeLa Cells via Clathrin-Mediated Endocytosis in a Cholesterol- and Dynamin-Dependent Manner
Source: MDPI journal article supplement (doi:10.3390/v13061035), 2021-05-31
Supplement: s1 [file s1]

Supplementary Figures

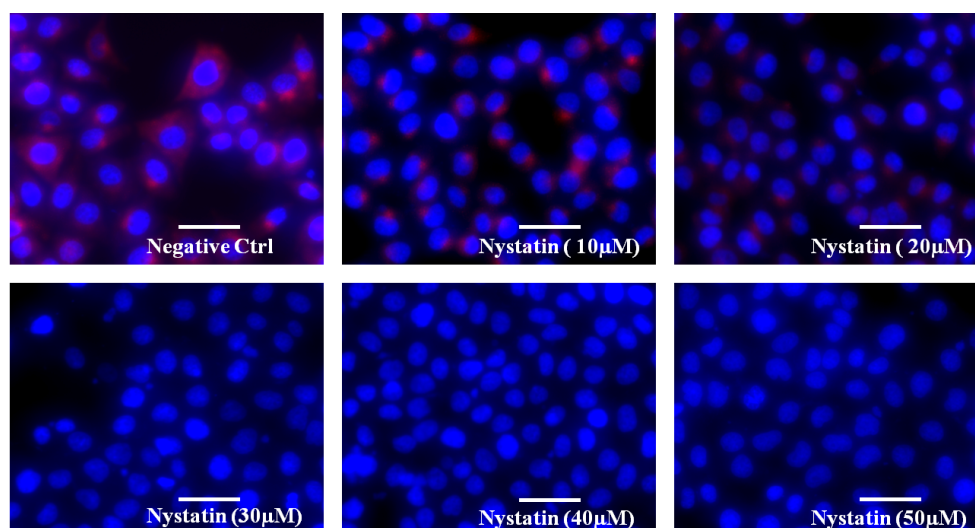

**S1. CTB uptake was inhibited by nystatin.** HeLa cells were treated with nystatin for 1 h and then incubated with 20  $\mu\text{g}/\text{ml}$  Alexa Fluor 555-labeled CTB for 30 min at 37  $^{\circ}\text{C}$ , noninternalized CTB-AF555 were removed by washing with 0.1 M glycine, 0.1 M NaCl at pH 3.0 and then washing with cold PBS for three times. Cells were fixed and DAPI stained. Scale bar = 50  $\mu\text{m}$ .
